# Supplementary material for: Chemotherapy-mediated p53-dependent DNA damage response in clear cell renal cell carcinoma: role of the mTORC1/2 and hypoxia-inducible factor pathways
Source: PubMed Central journal article supplement (PMC3920935; doi:10.1038/cddis.2013.395), 2013-10-17

# Supplementary Fig 1

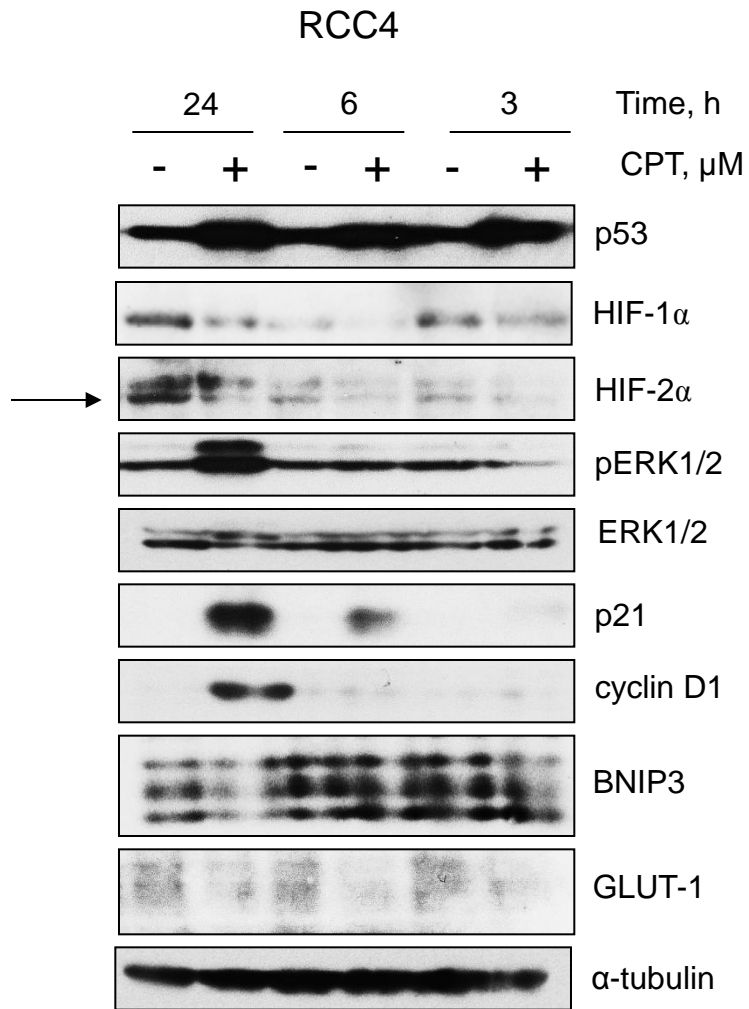

# Supplementary Fig 2

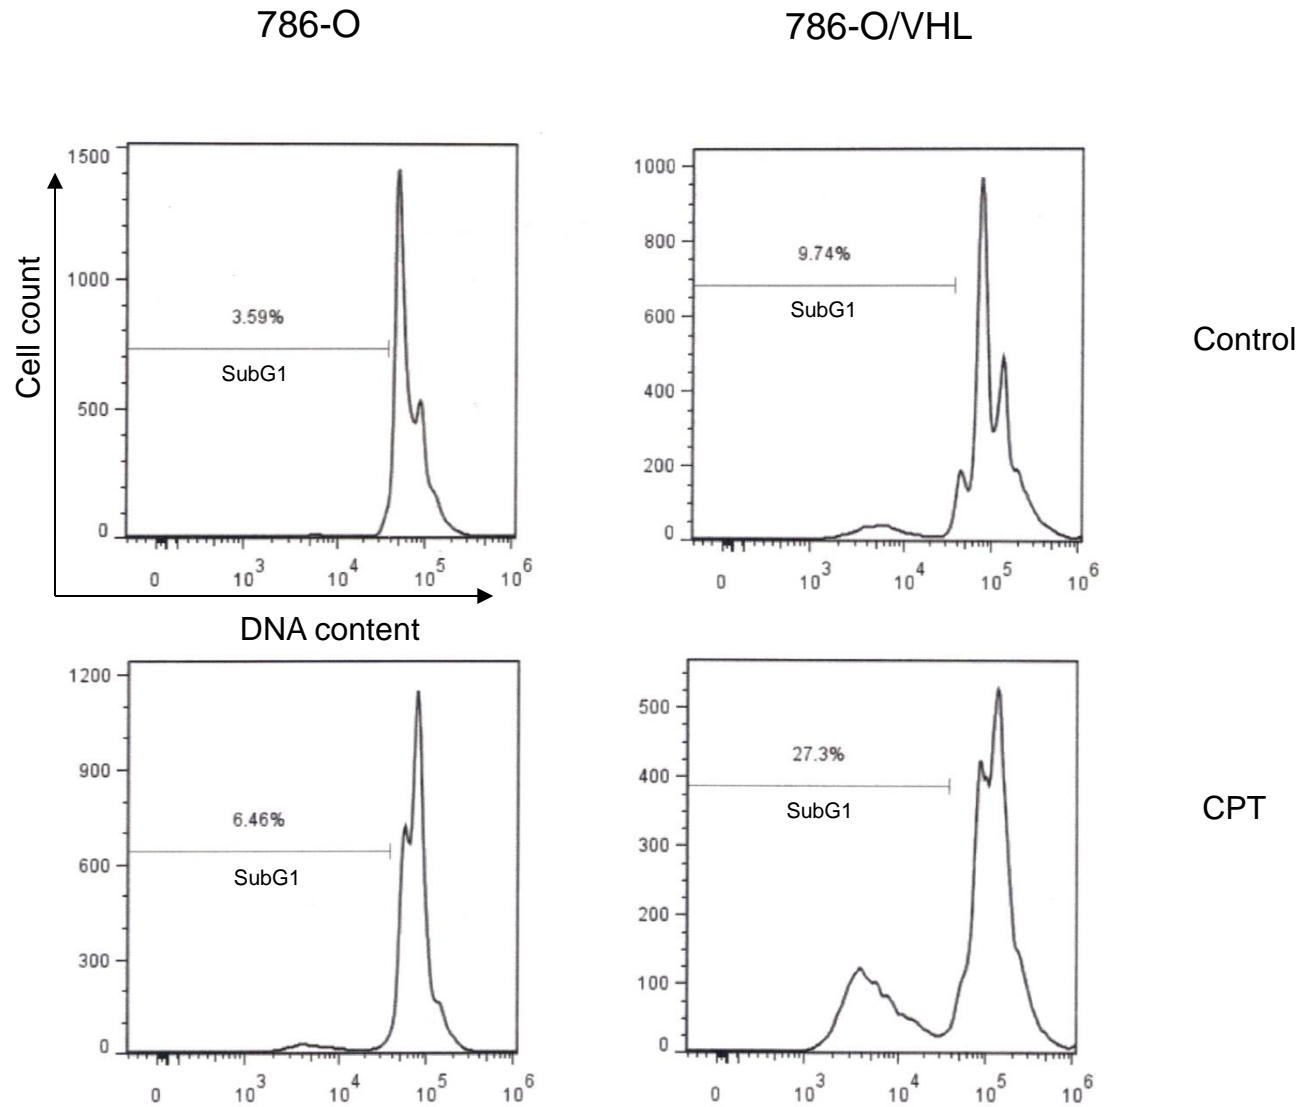

# Supplementary Fig 3

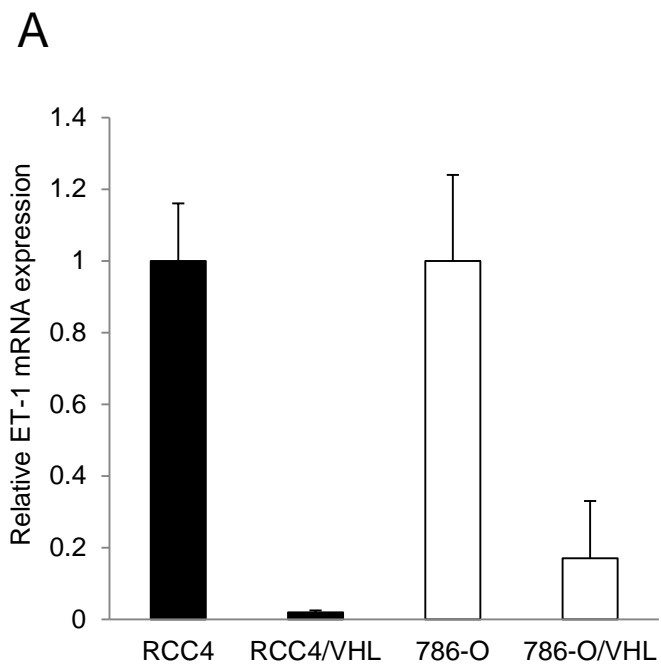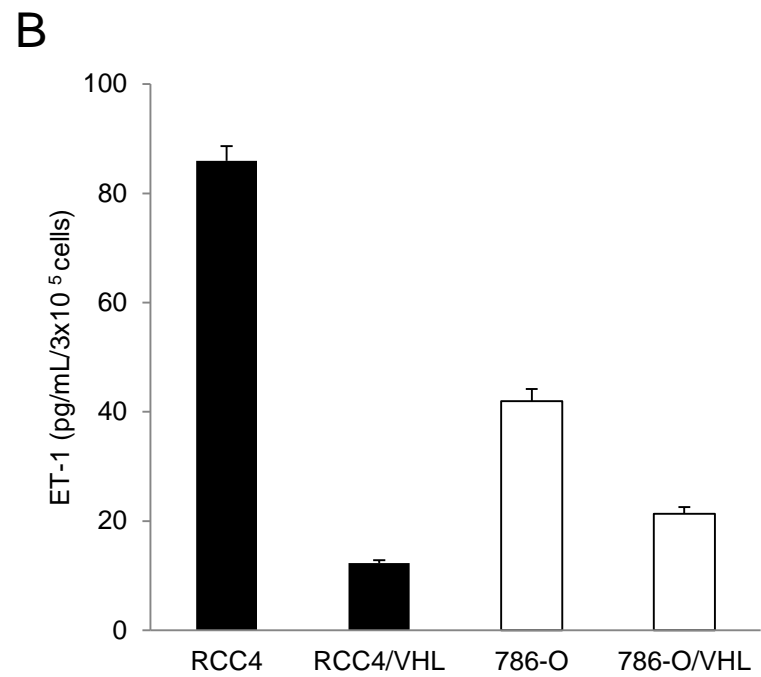

# Supplementary Fig 4

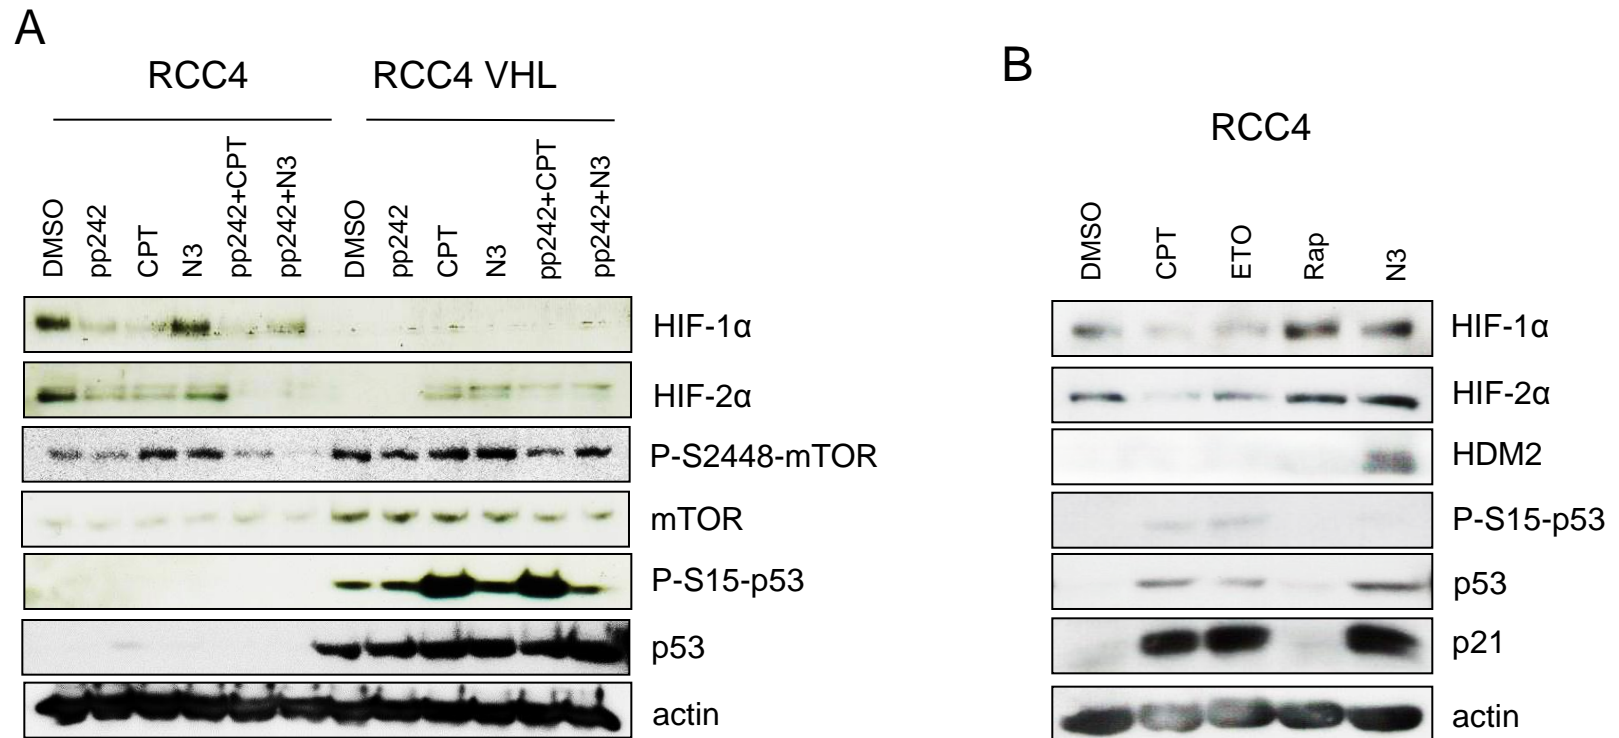

# Supplementary Fig 5

**A**

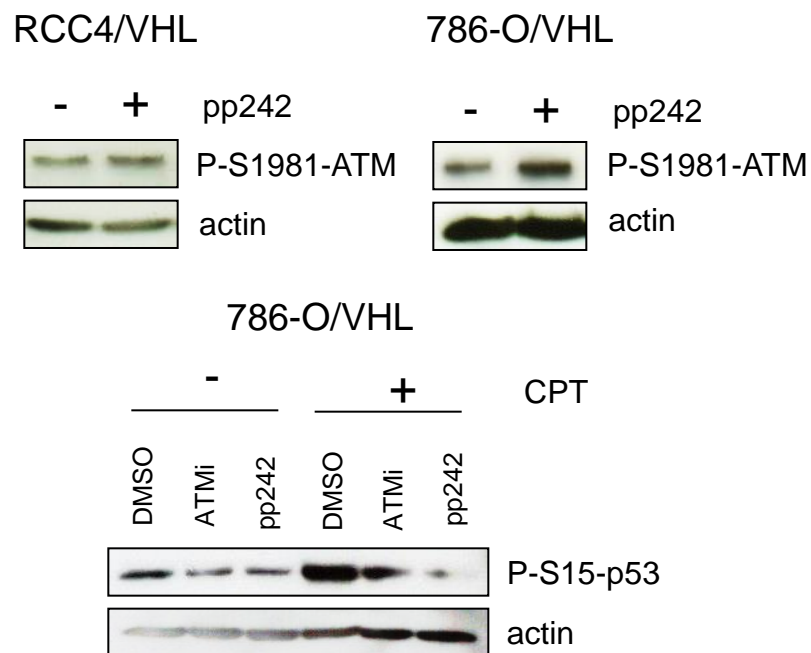

**B**

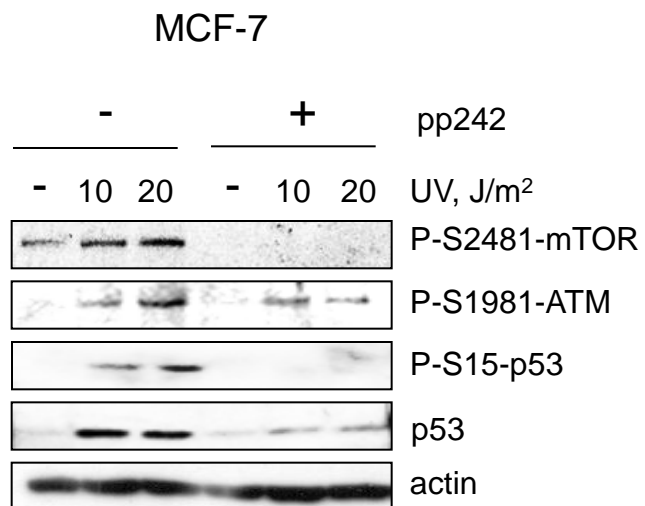

**C**

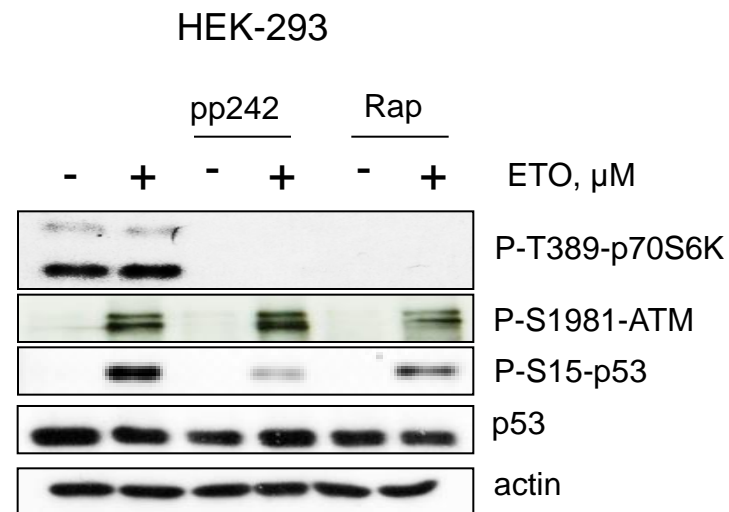

**D**

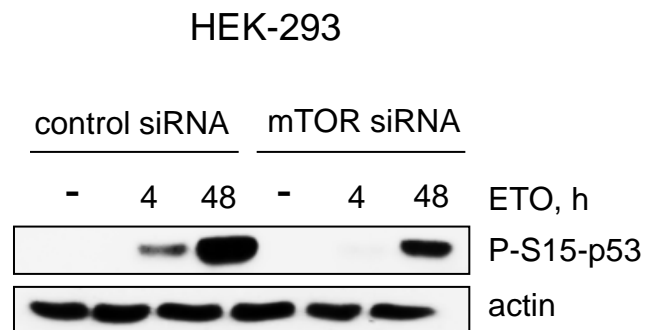

# Supplementary Fig 6

A

421 ggctcttta gaggatgcat gtcatta **tggaacctgctgccactgtcc** ctgttcccc  
 481 agctgtgact tcgagggagg tctggggatc tgagtctgtc caaacccacg gctttgctgt  
 541 tgggataaaa actgtccttt tgattttaga aggaggaggg aaaaaaggtt tcccagcatg  
 601 tgtgtgtgc cagtcttga aattcatccg tcttgaatt ccaccctcca tccccagaaa  
 661 aactggagta aaacaaaaag aggagatgga caaagtgtgt atttgatggc atcccctggg  
 721 aagagactct aaatttatcc cataggtctt actggggcac tgtgagcgt tgggtggaga  
 781 acaaacaaaa attctgggtg ctcagttgtc taacctgaaa aatgggacta gcggaaaaag  
 841 ccaatgtgtt ccatgcacct ttgtcttct ttattaaggc atgatgtcac ctgtacagta  
 901 actgcctgt gtgtactca ggggggatt tcaaggtag atagacagga aatgttttg  
 961 aaaatgtaa cacattatta aatgtgaagt attatctgat tcttgttcg aatggcattt  
 1021 ccttctcage accaccttcc ttgcatatc acttaacct gtacaagaac accttttgc  
 1081 cctaaatgaa gacaccccc caaaaaaag agtcccagaa aatatgtccc tgctgtgcg  
 1141 ggaataaat agaatttct gagggtcatt cctcttct atgtaggca acattcctg  
 1201 acctcctcg gccccaagc caggttgcg tttttctgc catttagaag ggtttcctt  
 1261 tttgtctag taaaacatca gccctgtag ctctcatct cccctgggt tcttctc**cc**  
**p53 DBS2<sub>(-704 to -726)</sub>**  
 1321 **gccatgtctt aagattgggtg g**caccgacca atcttaagat ttaagttctg tgtgaaaaac  
 1381 accttgcct tcaatcagt ttatcagcct cctccgagg ggaagtgtgg acacacaaaa  
 1441 gaacttatcg gggcttctca tcagtatag ggaaaagact ggcattgtcc taaacgagct  
 1501 ctgatgttat ttttaagctc ctttcttgc caatccctca cggatcttcc tccgatagat  
 1561 gcaaagaact tcagcaaaaa agaccgcag gaaggggctt gaagagaaaa gtacgttgat  
 1621 ctgcaaaaat agtctgacct ccagtgtgg ggcagtgcg agggagagca ttccctgtt  
 1681 tgactgagac tagaatcgga gagacataaa aggaaaatga agcgagcaac aattaaaaaa  
 1741 aattccccgc acacaacaat acaatctatt taaactgtgg ctacacttt tcataccaat  
 1801 ggtatgactt ttttctgga gtcccctct ctgattctg aactccgggg ctggcagctt  
 1861 gcaaagggga agcggactcc agcactgcac gggcaggttt agcaaaggtc tctaatgggt  
**p53 DBS1<sub>(-189 to -211)</sub>**  
 1921 atttctttt tct**tagccct gccccgaat tctcag**acgg cgggcgtctg cctctgaagt  
**HRE<sub>(-118)</sub>**  
 1981 tagcagtgat ttctttcgg gctggcctt atctccggt g**cacgtt**gcc tgttggtag  
 2041 taataacaca ataacattgt ctggggctgg aataaagtcg gagctgttta cccccactt  
 2101 aataggggtt caataaaaa agccggcaga gagctgtcca agtc**a**gacgc gcctctgcat  
 +1  
 →start

B

|       |   |   |   |   |   |   |   |   |   |   |   |   |   |   |   |   |   |   |   |   |   |   |   |   |
|-------|---|---|---|---|---|---|---|---|---|---|---|---|---|---|---|---|---|---|---|---|---|---|---|---|
| human | T | A | G | C | C | T | G | C | C | C | C | C | c | g | a | A | T | T | G | T | C | A | G |   |
| rat   | T | A | G | C | C | T | G | C | C | C | C | C | C | T | G | G | A | T | T | G | T | C | A | G |
| mouse | T | A | G | C | C | T | G | C | C | C | C | C | C | T | G | G | A | T | T | G | T | C | A | G |

# Supplementary Fig 6

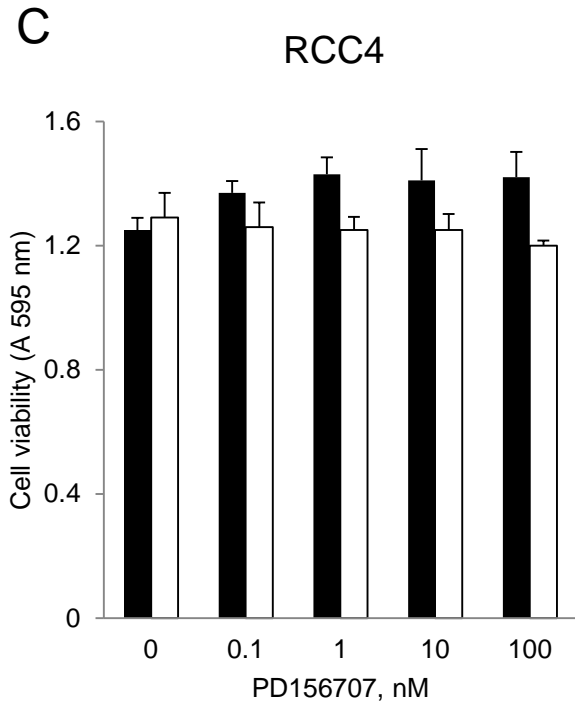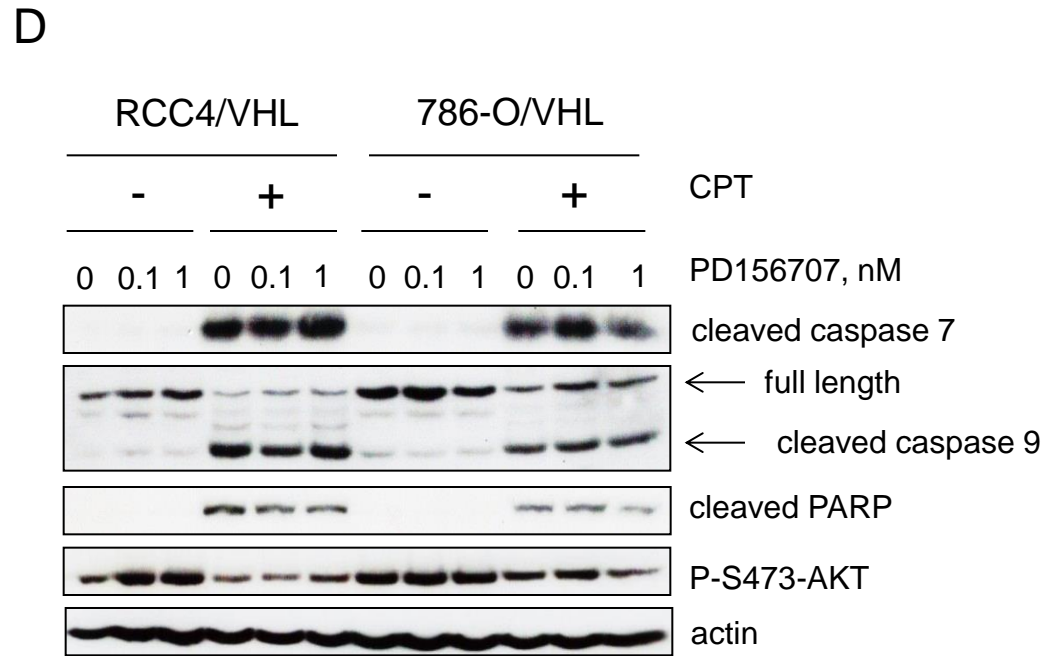

Supplement: cddis2013395x1.pdf [file cddis2013395x1.pdf]
